# Supplementary material
Source: MDPI journal article supplement (https://www.mdpi.com/2673-396X/4/1/9)
Supplement: s1 [file s1]

Supplementary Figure S1

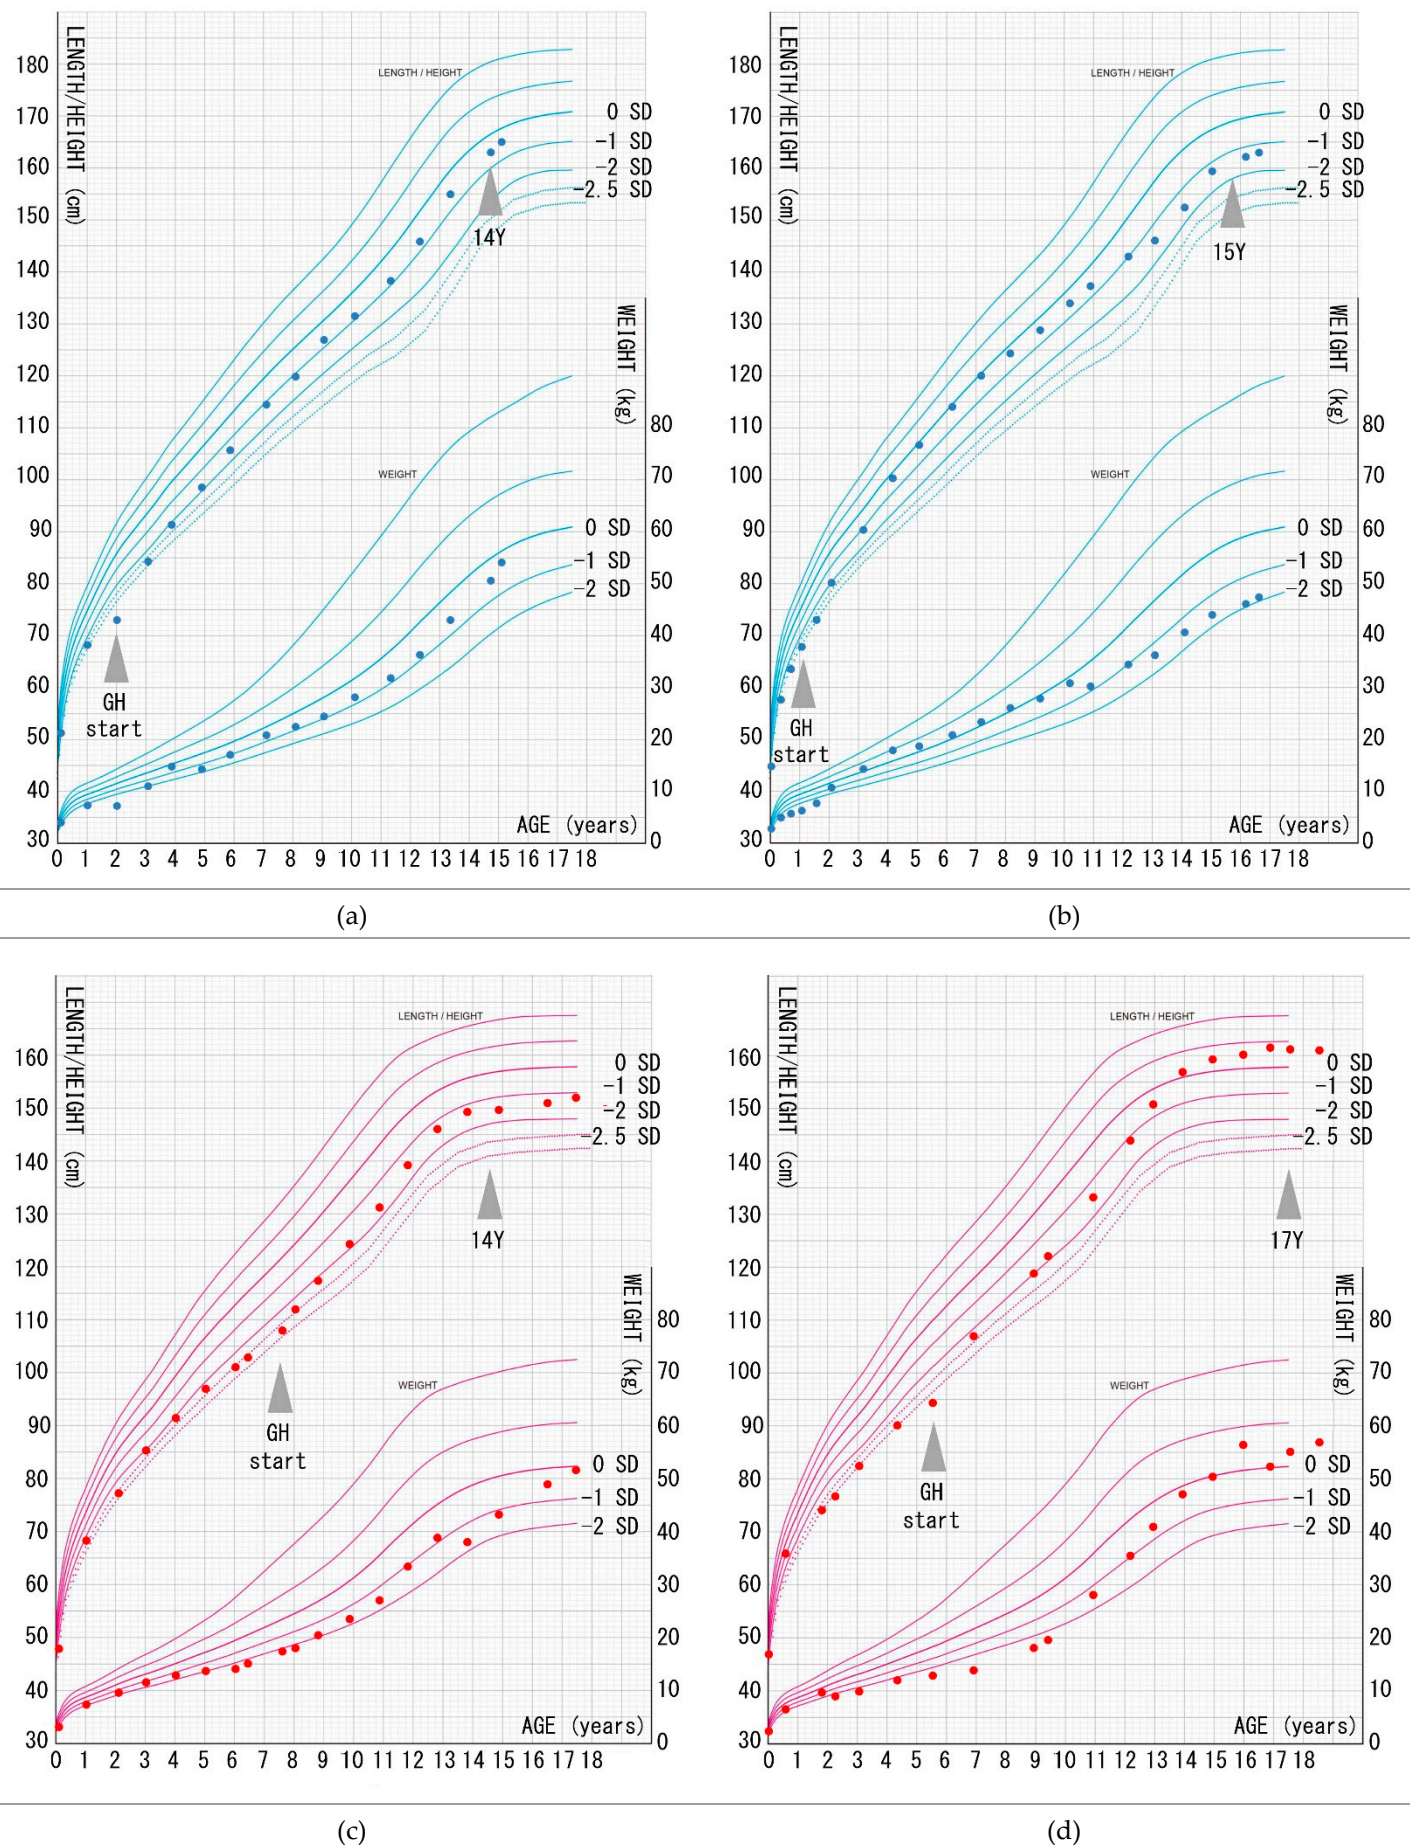

**Supplementary Figure S1.** Growth charts of two cases each for both low BMI and non-low BMI groups. Arrows show the start and the completion of GH replacement therapy. (a)(b) Low BMI group. (c)(d) Non-low BMI group. The charts were referenced from [20].
